# Supplementary material for: Enhancing breakpoint resolution with deep segmentation model: A general refinement method for read-depth based structural variant callers
Source: PLoS Comput Biol. 2021 Oct 11;17(10):e1009186. doi: 10.1371/journal.pcbi.1009186 (PMC8504719; doi:10.1371/journal.pcbi.1009186)
Supplement: S5 Table — (XLSX) [file pcbi.1009186.s005.xlsx]

## Sheet: S4_Table  RealData_cross_sample
		mean of to-GS-distances										std of to-GS-distances
		<5	[5,10)	[10,20)	[20,50)	[50,100)	[100,200)	[200,500)	[500,1000)	>=1000		<5	[5,10)	[10,20)	[20,50)	[50,100)	[100,200)	[200,500)	[500,1000)	>=1000
NA19238	/	2.35	7.27	15	35.17	65.55	141.26	329.71	689.41	4553.32		1.39	1.3	2.8	8.27	11.61	30.25	97.58	136.66	7581.48
	CNN	2.04	6.66	13.85	32.45	71.26	140.74	314.26	705.37	4709.07		1.24	1.4	2.86	8.28	14.26	28.69	90.31	148.2	7933.48
	Unet	1.29	6.62	13.84	32.44	70.82	143.58	310.9	690.37	4493.61		1.35	1.43	2.79	8.64	13.72	30.29	89.01	140.73	7707.92
NA19239	/	2.06	7.39	15.17	35.65	65.1	140.46	321.27	686.16	3923.15		1.25	1.37	2.76	8.41	11.96	31.29	91.95	141.3	6207.5
	CNN	2.13	6.69	13.6	31.83	70.95	141.58	322.54	705.53	3974.33		1.29	1.39	2.72	8.57	13.97	28.4	96.15	145.04	6249.28
	Unet	1.26	7.03	13.86	33.26	70.6	141.97	322.93	708.59	3932.57		1.33	1.44	2.71	8.94	12.88	30.1	92.15	128.35	6207.13
